# Supplementary material for: Climate Change and Farmer Livelihoods in Wayanad, India: A Livelihood Vulnerability Index Assessment
Source: Copernicus journal article supplement (doi:10.5194/nhess-2024-155), 2024-09-30
Supplement: Supplementary file [file nhess-2024-155-AC1-supplement.pdf]

## The effect of temperature range variation on the yield of various crops

| Crop Name    | Temperature Range (°C)                                | Change in Yield                                                                                                                                                                                                                                               | Study Reference                                                                                                                               |
|--------------|-------------------------------------------------------|---------------------------------------------------------------------------------------------------------------------------------------------------------------------------------------------------------------------------------------------------------------|-----------------------------------------------------------------------------------------------------------------------------------------------|
| Rice         | High temperatures during flowering and filling stages | Significant reductions in yield due to spikelet sterility and reduced kernel weights. Yield reductions linked to extreme heat events.                                                                                                                         | <a href="#">Heat stress may cause a significant reduction of rice yield in China under future climate scenarios</a>                           |
| Coffee       | Above 20-25°C                                         | Moderate to significant reductions in productivity; excessive heat can lead to small leaves and shrunken fruits.                                                                                                                                              | <a href="#">Impacts of drought and temperature stress on coffee physiology and production: a review</a>                                       |
| Black Pepper | 21–29 °C                                              | The optimal temperature range of fruit formation and quality is between 21 and 29 °C. When temperature exceeds 32 °C, the hot pepper growth can be slow; blossom end rot (BER) can be observed on fruits; and fruit-set ceases may emerge, with lower yields. | <a href="#">Comparative heat stress responses of three hot pepper (<i>Capsicum annuum</i> L.) genotypes differing temperature sensitivity</a> |
| Ginger       | 20–28 °C                                              | The optimal daily average temperature for ginger growth is between 20–28 °C [27].                                                                                                                                                                             | <a href="#">Influence of High-Temperature and Intense Light on the Enzymatic Antioxidant</a>                                                  |

|        |                      |                                                                                                                           |                                                                                |
|--------|----------------------|---------------------------------------------------------------------------------------------------------------------------|--------------------------------------------------------------------------------|
|        |                      | Intense solar radiation can harm young plants, especially when combined with air temperatures exceeding 35 °C [28].       | <a href="#">System in Ginger (<i>Zingiber officinale</i> Roscoe) Plantlets</a> |
| Banana | Above 1.5°C increase | Increased vulnerability to heat waves affecting productivity; potential for both positive and negative impacts on growth. | <a href="#">Banana Cultivation for Resilience to Climate Change</a>            |
